# Supplementary material for: Long‐term safety and efficacy of antimuscarinic add‐on therapy in patients with overactive bladder who had a suboptimal response to mirabegron monotherapy: A multicenter, randomized study in Japan (MILAI II study)
Source: PubMed Central journal article supplement — Int J Urol. 2018 Dec 13;26(3):342–52. doi: 10.1111/iju.13868 (PMC7379522; doi:10.1111/iju.13868), 2018-12-13
Supplement: IJU-26-342-s001.pdf [file IJU-26-342-s001.pdf]

**Fig. S1 Change from baseline in mean pulse rate (measured by patients)**  
**(a) on awakening and (b) 6 h post-dose.**

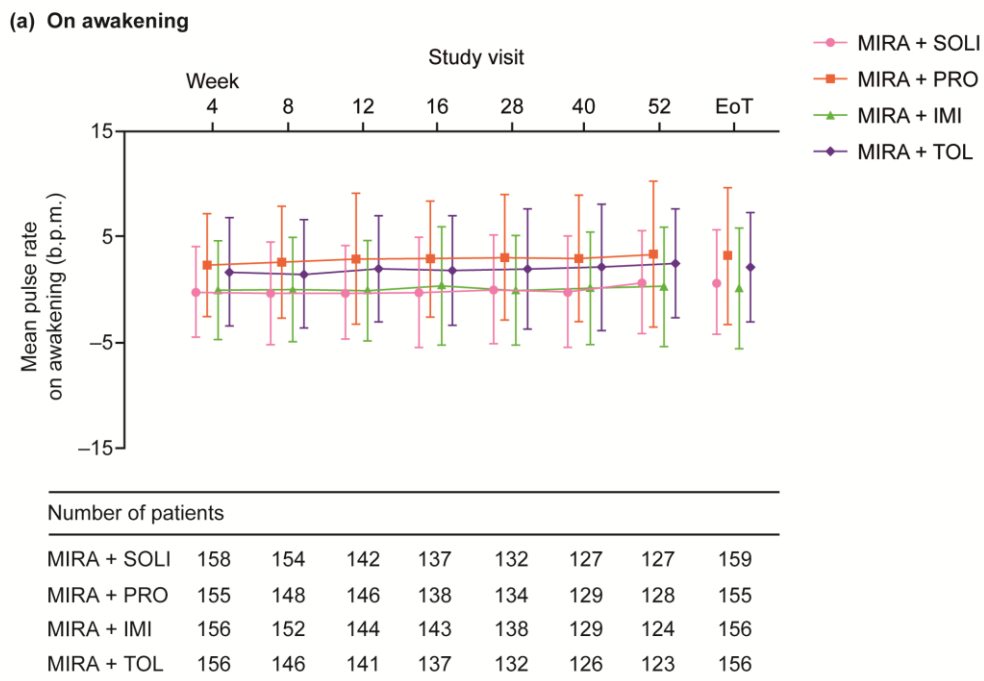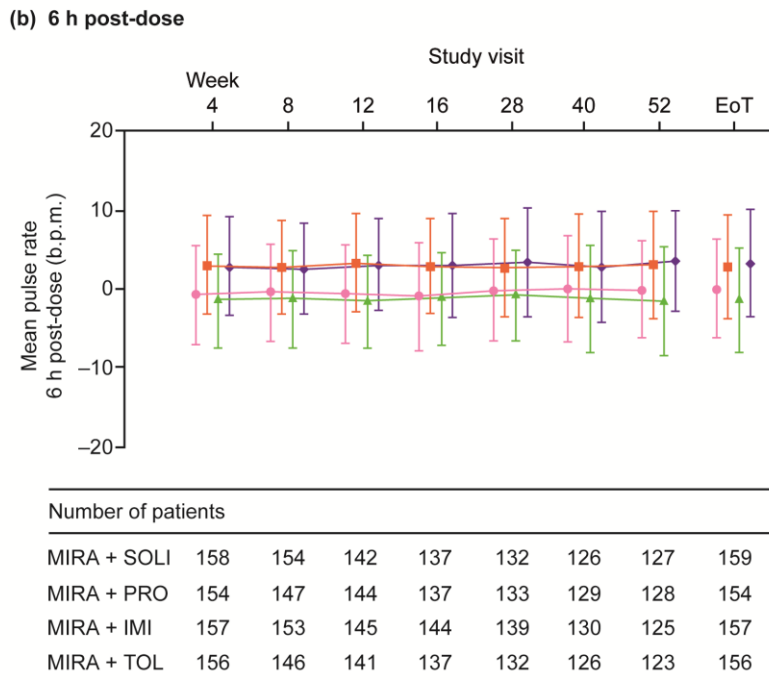

Data represent mean  $\pm$  SD.

Data shown for the SAF (patients who received at least one dose of study drug).

EoT, end of treatment; IMI, imidafenacin; MIRA, mirabegron; PRO, propiverine; SAF, safety analysis set; SD, standard deviation; SOLI, solifenacin; TOL, tolterodine.
