# Supplementary material for: Long‐term safety and efficacy of antimuscarinic add‐on therapy in patients with overactive bladder who had a suboptimal response to mirabegron monotherapy: A multicenter, randomized study in Japan (MILAI II study)
Source: PubMed Central journal article supplement — Int J Urol. 2018 Dec 13;26(3):342–52. doi: 10.1111/iju.13868 (PMC7379522; doi:10.1111/iju.13868), 2018-12-13
Supplement: IJU-26-342-s004.pdf [file IJU-26-342-s004.pdf]

**Table S1 Inclusion and exclusion criteria**

| <b>Inclusion criteria</b>                                                                                                                                                                                                                                          | <b>Exclusion criteria</b>                                                                                                                                                                                                                                                                                             |
|--------------------------------------------------------------------------------------------------------------------------------------------------------------------------------------------------------------------------------------------------------------------|-----------------------------------------------------------------------------------------------------------------------------------------------------------------------------------------------------------------------------------------------------------------------------------------------------------------------|
| <i>Provisional enrollment (at screening)</i>                                                                                                                                                                                                                       |                                                                                                                                                                                                                                                                                                                       |
| Written informed consent before starting the study                                                                                                                                                                                                                 | Stress urinary incontinence                                                                                                                                                                                                                                                                                           |
| Patient was $\geq 20$ years of age at the time of informed consent. Female patients had to be an outpatient with OAB who had been postmenopausal for $\geq 1$ year. Male patients had to be an outpatient with OAB who did not wish to have children in the future | Transient symptoms suggestive of OAB                                                                                                                                                                                                                                                                                  |
| Previously treated with MIRA at a stable dose of 50 mg once daily for $\geq 6$ weeks before the start of the screening period                                                                                                                                      | Urinary tract infection, urinary calculus, or interstitial cystitis, or a history of recurrent urinary tract infection ( $\geq 3$ episodes within 24 weeks before the start of the screening period)                                                                                                                  |
| Capable of walking to the bathroom without assistance                                                                                                                                                                                                              | Bladder or prostate tumor or a medical history of these type of tumors                                                                                                                                                                                                                                                |
| OABSS total score of $\geq 3$ points and an OABSS question 3 score of $\geq 2$ points                                                                                                                                                                              | PVR volume of $\geq 100$ mL or had benign prostatic hyperplasia or lower urinary tract obstruction                                                                                                                                                                                                                    |
|                                                                                                                                                                                                                                                                    | Uncontrolled hypertension (SBP of $\geq 180$ mmHg or DBP of $\geq 110$ mmHg measured in a sitting position)                                                                                                                                                                                                           |
|                                                                                                                                                                                                                                                                    | Pulse rate of $\geq 110$ b.p.m. or $< 50$ b.p.m.                                                                                                                                                                                                                                                                      |
|                                                                                                                                                                                                                                                                    | Contraindication to antimuscarinics                                                                                                                                                                                                                                                                                   |
|                                                                                                                                                                                                                                                                    | Glaucoma, ulcerative colitis, hyperthyroidism, dementia, cognitive dysfunction, parkinsonism symptoms, or a clinically significant cerebrovascular disorder                                                                                                                                                           |
|                                                                                                                                                                                                                                                                    | Serious heart disease, liver disease, kidney disease, immunological disease, lung disease, etc., or a previous malignant tumor (except patients who had not received treatment for a malignant tumor for $\geq 5$ years before the start of the screening period and were not considered to be at risk of recurrence) |
|                                                                                                                                                                                                                                                                    | Known hypersensitivity to $\beta$ -agonists or antimuscarinics                                                                                                                                                                                                                                                        |
|                                                                                                                                                                                                                                                                    | Receiving treatment with flecainide acetate or propafenone hydrochloride                                                                                                                                                                                                                                              |
|                                                                                                                                                                                                                                                                    | Long QT syndrome; vulnerable to an arrhythmia, such as bradycardia or acute myocardial ischemia; hypokalemia; or ischemic heart disease, such as angina pectoris                                                                                                                                                      |
|                                                                                                                                                                                                                                                                    | Used any prohibited concomitant medication within 4 weeks before the start of the screening period                                                                                                                                                                                                                    |

| Inclusion criteria                                                                                                 | Exclusion criteria                                                                                                                                                                                                                                                                                                                                                                                                                                                                                                                                                                                                                                                                                                                                                                                                                                                                                                                                                                                                     |
|--------------------------------------------------------------------------------------------------------------------|------------------------------------------------------------------------------------------------------------------------------------------------------------------------------------------------------------------------------------------------------------------------------------------------------------------------------------------------------------------------------------------------------------------------------------------------------------------------------------------------------------------------------------------------------------------------------------------------------------------------------------------------------------------------------------------------------------------------------------------------------------------------------------------------------------------------------------------------------------------------------------------------------------------------------------------------------------------------------------------------------------------------|
|                                                                                                                    | <p>Receiving catheterization or intermittent self-catheterization or had pelvic organ prolapse that affected urinary tract function</p> <p>Received radiotherapy that affected urinary tract function</p> <p>Received surgical therapy that may have affected urinary tract functioning within 24 weeks before the start of the screening period</p> <p>Received non-pharmacological therapy for OAB such as electric stimulation therapy, biofeedback therapy, bladder training, or pelvic floor muscle exercise training within 2 weeks before the start of the screening period</p> <p>Diagnosed with a mood disorder, a neurotic disorder, or schizophrenia, or had a history of these diseases</p> <p>Participated in any clinical trial or post-marketing clinical study, involving other ethical drugs or medical equipment, within 12 weeks before the start of the screening period or was currently participating in this type of study</p> <p>Judged to be unsuitable for the study by the investigator</p> |
| <i>Final enrollment (at randomization)</i>                                                                         |                                                                                                                                                                                                                                                                                                                                                                                                                                                                                                                                                                                                                                                                                                                                                                                                                                                                                                                                                                                                                        |
| <p>OABSS total score of <math>\geq 3</math> points and an OABSS question 3 score of <math>\geq 2</math> points</p> | <p>Polyuria with a mean daily urine volume of <math>&gt;3000</math> mL (confirmed using the micturition diary during the screening period)</p> <p>PVR volume of <math>\geq 100</math> mL or had benign prostatic hyperplasia or lower urinary tract obstruction</p> <p>Uncontrolled hypertension (SBP of <math>\geq 180</math> mmHg or DBP of <math>\geq 110</math> mmHg measured in a sitting position)</p> <p>Pulse rate of <math>\geq 110</math> b.p.m. or <math>&lt;50</math> b.p.m.</p> <p>Any of the following after examination of the screening visit results: an abnormal ECG that precluded participation or a QTcF of <math>\geq 450</math> ms, AST or ALT of <math>\geq 100</math> IU/L, or creatinine of <math>\geq 2.0</math> mg/dL</p> <p>Satisfied any of the screening exclusion criteria</p> <p>Not eligible for the study in the opinion of the investigator</p>                                                                                                                                    |

ALT, alanine aminotransferase; AST, aspartate aminotransferase; DBP, diastolic blood pressure; ECG, electrocardiogram; MIRA, mirabegron; OAB, overactive bladder; OABSS, overactive bladder symptom score; PVR, post-void residual; QTcF, QT interval corrected for heart rate by Fridericia's formula; SBP, systolic blood pressure.
